# Supplementary material
Source: PubMed Central journal article supplement (PMC3969093)

## SUPPORTING INFORMATION

# Development of Selective Inhibitors for Aldehyde Dehydrogenases based on Substituted Indole-2,3-diones

*Ann C. Kimble-Hill, Bibek Parajuli, Che-Hong Chen, Daria Mochly-Rosen, Thomas D. Hurley*

### Supplementary figures

|            |     |
|------------|-----|
| Figure S1  | S2  |
| Figure S2  | S2  |
| Figure S3  | S3  |
| Figure S4  | S3  |
| Figure S5  | S4  |
| Figure S6  | S4  |
| Figure S7  | S5  |
| Figure S8  | S5  |
| Figure S9  | S6  |
| Figure S10 | S6  |
| Figure S11 | S7  |
| Figure S12 | S7  |
| Figure S13 | S8  |
| Figure S14 | S8  |
| Figure S15 | S9  |
| Figure S16 | S9  |
| Figure S17 | S10 |
| Figure S18 | S10 |
| Figure S19 | S11 |
| Figure S20 | S11 |
| Figure S21 | S12 |
| Figure S22 | S12 |
| Figure S23 | S13 |
| Figure S24 | S13 |
| Figure S25 | S14 |
| Figure S26 | S14 |
| Figure S27 | S15 |
| Figure S28 | S15 |
| Figure S29 | S16 |
| Figure S30 | S16 |
| Figure S31 | S17 |
| Figure S32 | S17 |

**Figure S1.** Lineweaver-Burk plot of the non-linear fit to the non-competitive inhibition equation for the effect of **1** versus varied  $\text{NAD}^+$  at fixed saturating propionaldehyde concentration on ALDH2. The plots shown are fits based on  $\bullet$  0,  $\circ$  2,  $\blacktriangledown$  2.5,  $\Delta$  2.75, and  $\blacksquare$  3  $\mu\text{M}$  inhibitor concentrations.

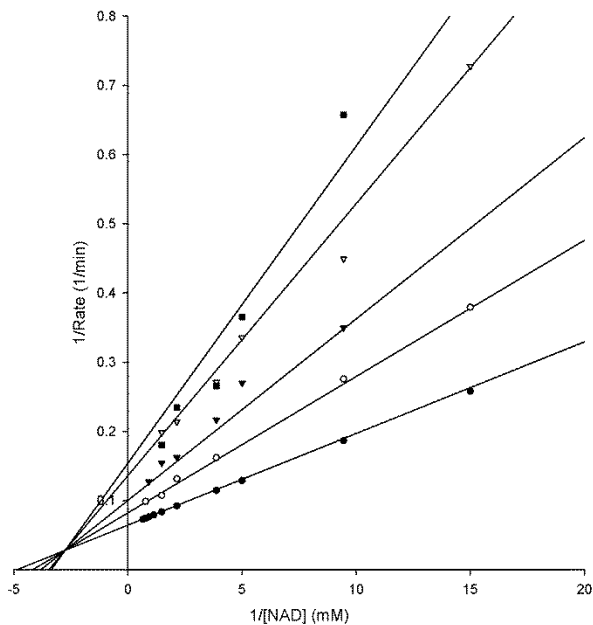

**Figure S2.** Lineweaver-Burk plot of the non-linear fit to the non-competitive inhibition equation for the effect of **3** versus varied  $\text{NAD}^+$  at fixed saturating propionaldehyde concentration on ALDH2. The plots shown are fits based on  $\bullet$  0,  $\circ$  10,  $\blacktriangledown$  25,  $\Delta$  50, and  $\blacksquare$  70  $\mu\text{M}$  inhibitor concentrations.

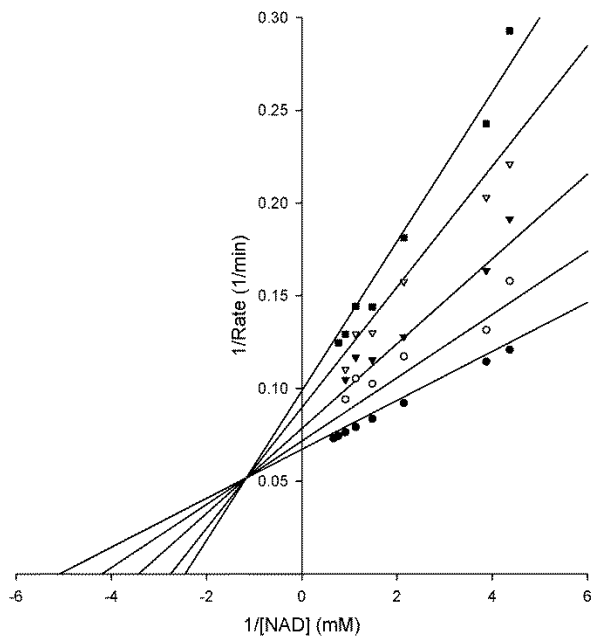

**Figure S3.** Lineweaver-Burk plot of the non-linear fit to the non-competitive inhibition equation for the effect of **1** versus varied  $\text{NAD}^+$  at fixed saturating propionaldehyde concentration on ALDH1. The plots shown are fits based on  $\bullet$  0;  $\circ$  0.14,  $\blacktriangledown$  0.28,  $\Delta$  0.57, and  $\blacksquare$  0.71  $\mu\text{M}$  inhibitor concentrations.

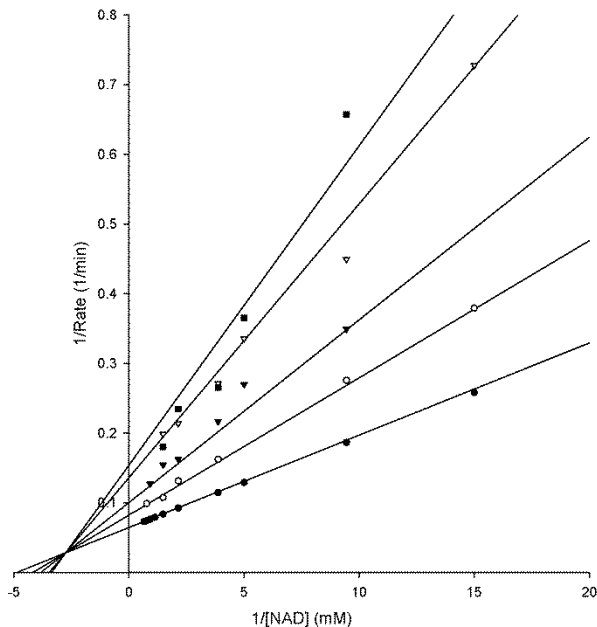

**Figure S4.** Lineweaver-Burk plot of the non-linear fit to the non-competitive inhibition equation for the effect of **1** versus varied  $\text{NADP}^+$  at fixed saturating benzaldehyde concentration on ALDH3. The plots shown are fits based on  $\bullet$  0;  $\circ$  0.15,  $\blacktriangledown$  0.20,  $\Delta$  0.45,  $\blacksquare$  0.62, and  $\square$  0.99  $\mu\text{M}$  inhibitor concentrations.

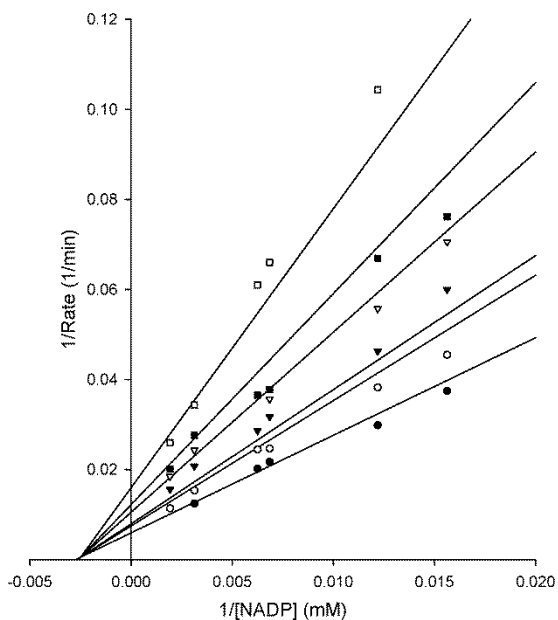

**Figure S5.** Lineweaver-Burk plot of the non-linear fit to the non-competitive inhibition equation for the effect of **3** versus varied  $\text{NADP}^+$  at fixed saturating benzaldehyde concentration on ALDH3. The plots shown are fits based on  $\bullet$  0,  $\circ$  3,  $\blacktriangledown$  5,  $\Delta$  8,  $\blacksquare$  10, and  $\square$  25  $\mu\text{M}$  inhibitor concentrations.

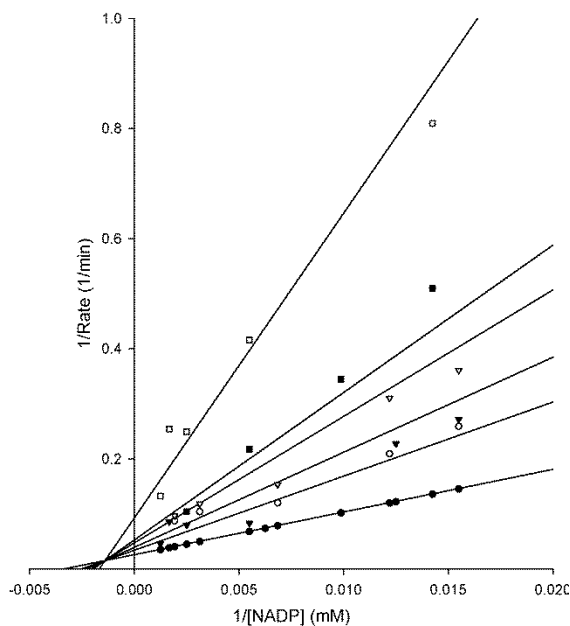

**Figure S6.** Lineweaver-Burk plot of the non-linear fit to the non-competitive inhibition equation for the effect of **1** versus varied propionaldehyde at fixed saturating  $\text{NAD}^+$  concentration on ALDH2. The plots shown are fits based on  $\bullet$  0,  $\circ$  0.33,  $\blacktriangledown$  0.67,  $\Delta$  1,  $\blacksquare$  2, and  $\square$  3.3  $\mu\text{M}$  inhibitor concentrations.

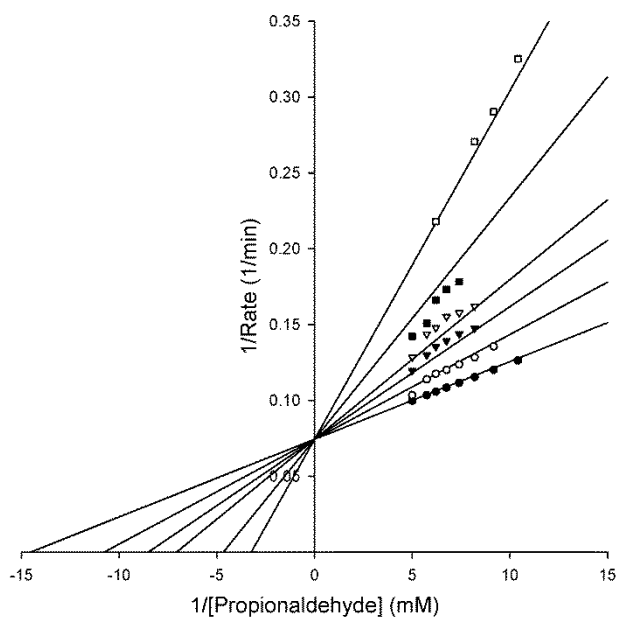

**Figure S7.** Lineweaver-Burk plot of the non-linear fit to the non-competitive inhibition equation for the effect of **3** versus varied propionaldehyde at fixed saturating  $\text{NAD}^+$  concentration on ALDH2. The plots shown are fits based on  $\bullet$  0,  $\circ$  50,  $\blacktriangledown$  70, and  $\Delta$  150  $\mu\text{M}$  inhibitor concentrations.

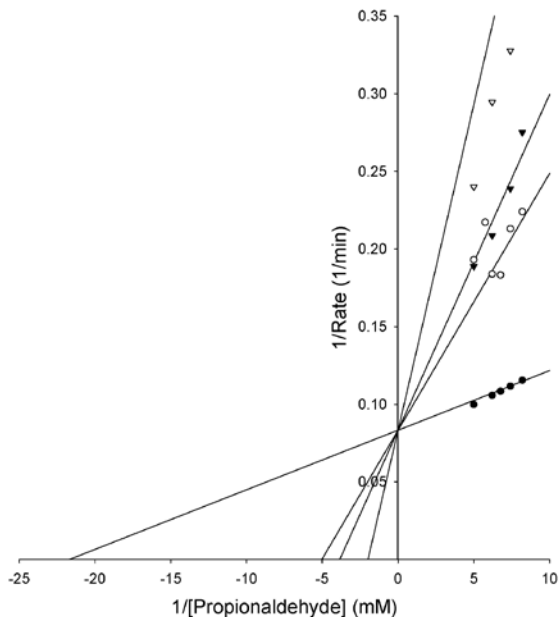

**Figure S8.** Lineweaver-Burk plot of the non-linear fit to the non-competitive inhibition equation for the effect of **1** versus varied propionaldehyde at fixed saturating  $\text{NAD}^+$  concentration on ALDH1. The plots shown are fits based on  $\bullet$  0, 0.36,  $\blacktriangledown$  0.48, and  $\Delta$  0.8  $\mu\text{M}$  inhibitor concentrations.

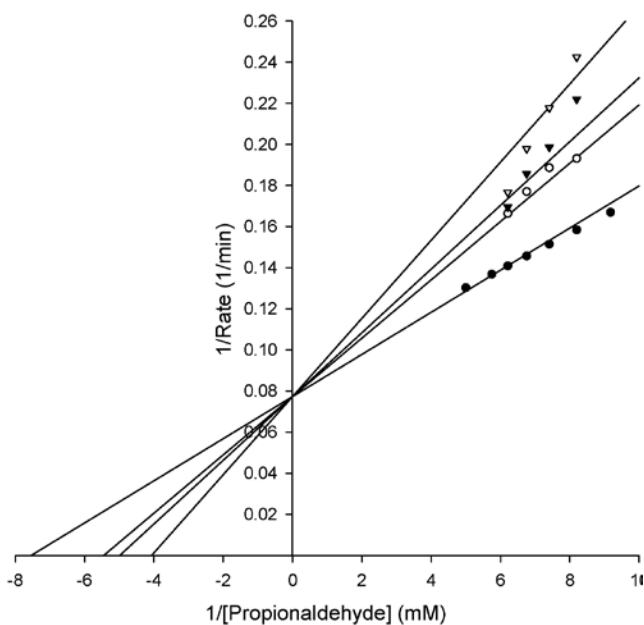

**Figure S9.** Lineweaver-Burk plot of the non-linear fit to the non-competitive inhibition equation for the effect of **1** versus varied benzaldehyde at fixed saturating NADP<sup>+</sup> concentration on ALDH3. The plots shown are fits based on • 0, ◊ 0.19, ▼ 0.49, and Δ 0.79 μM inhibitor concentrations.

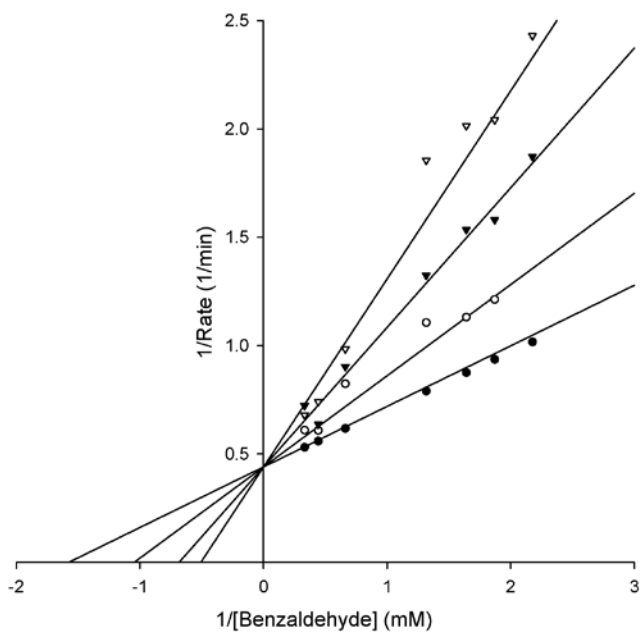

**Figure S10.** Lineweaver-Burk plot of the non-linear fit to the non-competitive inhibition equation for the effect of **3** versus varied benzaldehyde at fixed saturating NADP<sup>+</sup> concentration on ALDH3. The plots shown are fits based on • 0, ◊ 1, ▼ 2.5, Δ 5, and ■ 7 μM inhibitor concentrations.

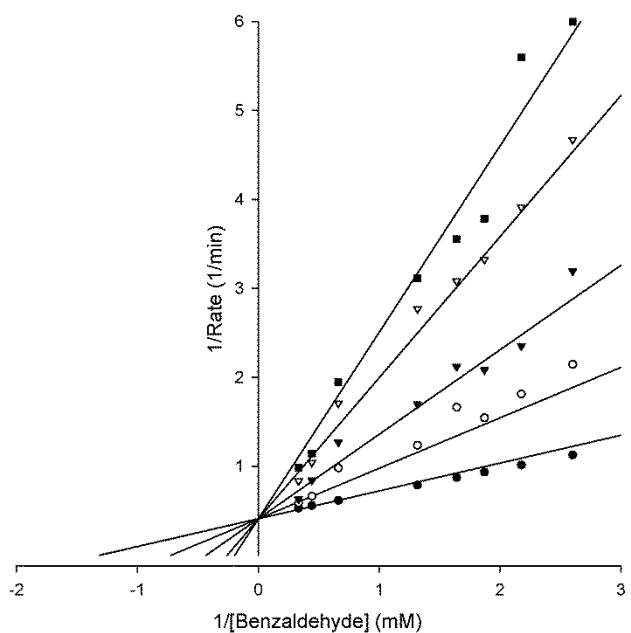

**Figure S11.** NMR Spectra provided by vendor of 1-benzyl-5-bromo-1H-indole-2,3-dione (5).

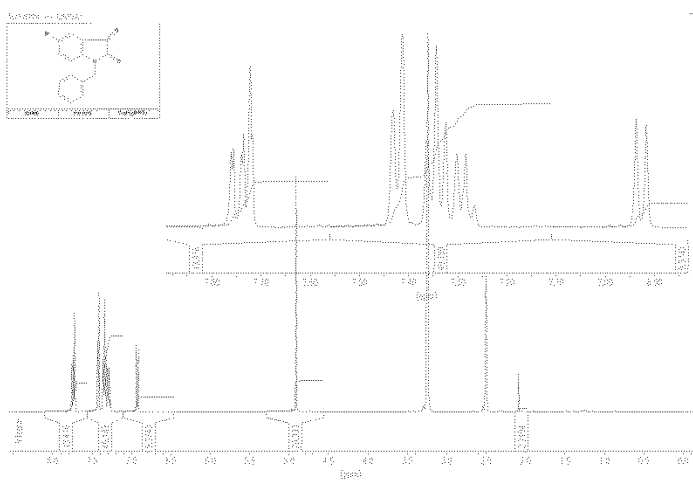

**Figure S12.** NMR Spectra provided by vendor of 1-(2-phenylethyl)-1H-indole-2,3-dione (6).

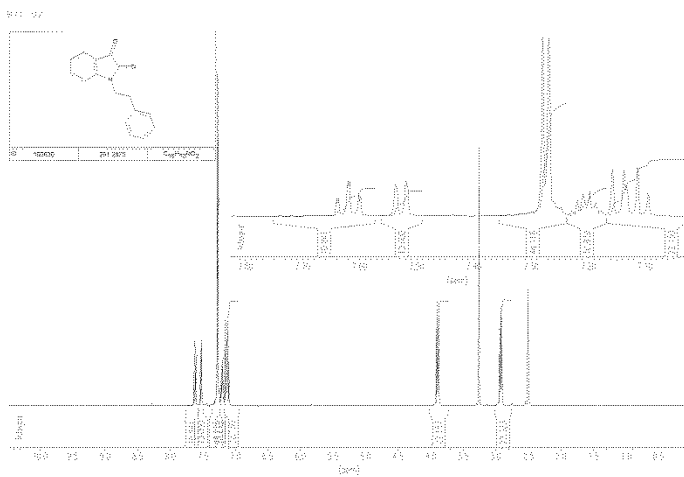

**Figure S13.** NMR Spectra provided by vendor of 5-chloro-1-(2-phenylethyl)-1H-indole-2,3-dione (**7**).

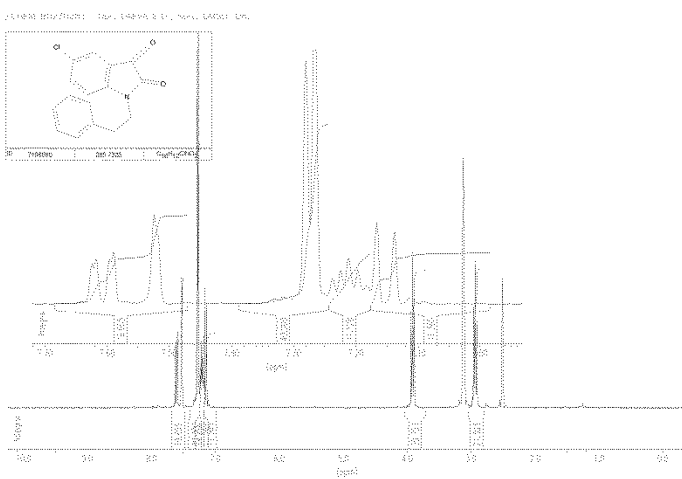

**Figure S14.** NMR Spectra provided by vendor of 5-bromo-1-(2-phenylethyl)-1H-indole-2,3-dione (**8**).

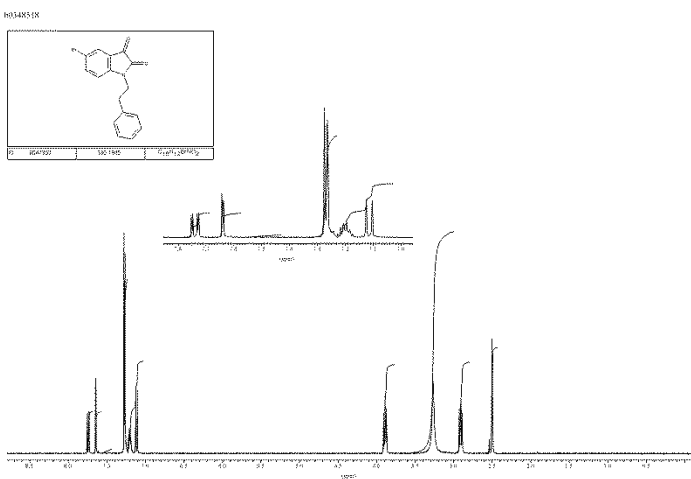



**Figure S15.** NMR Spectra provided by vendor of 7-bromo-5-methyl-1H-indole-2,3-dione (**1**).

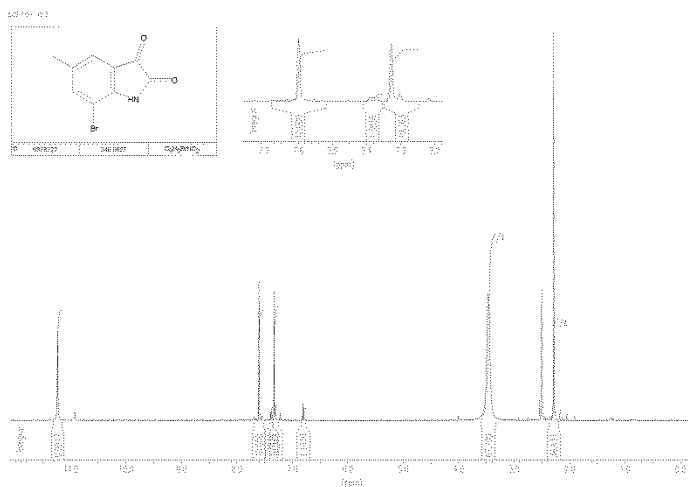

**Figure S16.** NMR Spectra provided by vendor of 1-(3-phenylpropyl)-1H-indole-2,3-dione (**9**).

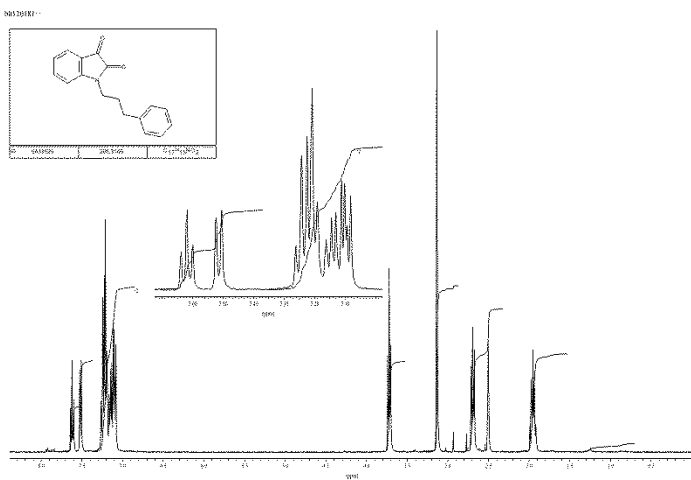

**Figure S17.** NMR Spectra provided by vendor of 1-(3-phenyl-2-propen-1-yl)-1H-indole-2,3-dione (**10**).

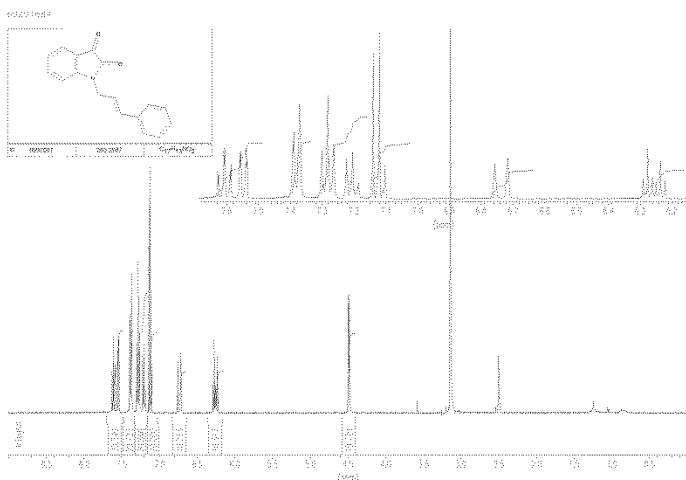

**Figure S18.** NMR Spectra provided by vendor of 1-{[4-(1,3-benzodioxol-5-ylmethyl)-1-piperazinyl]methyl}-1H-indole-2,3-dione (**20**).

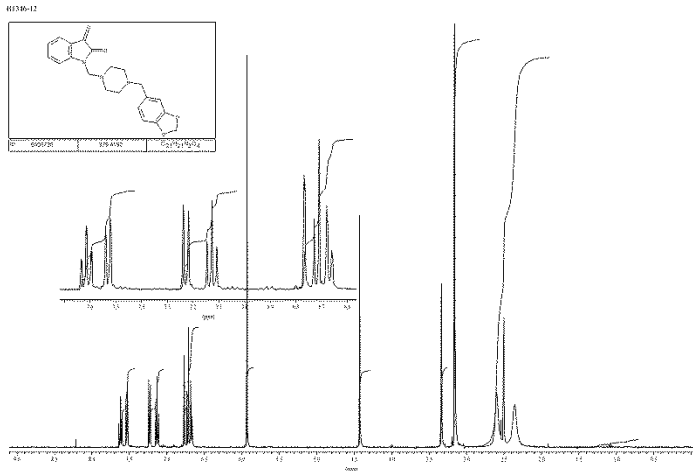

**Figure S19.** NMR Spectra provided by vendor of 1-{[4-(4-fluorobenzyl)-1-piperazinyl]methyl}-1H-indole-2,3-dione (**16**)

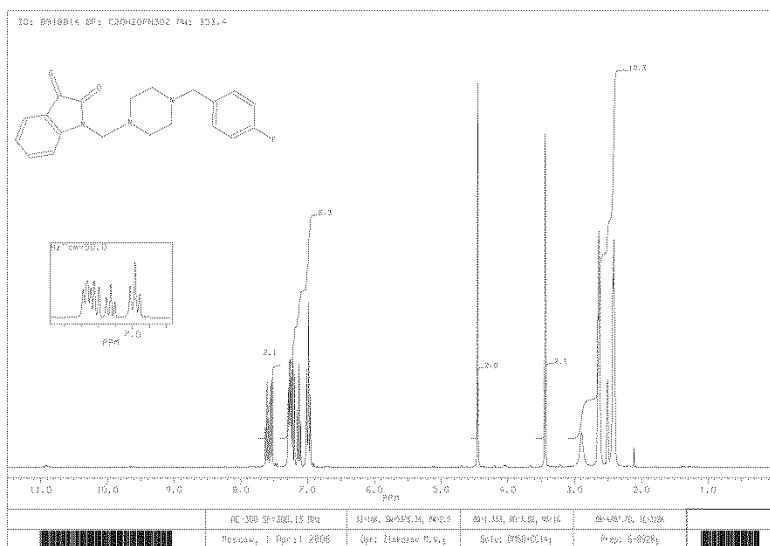

**Figure S20.** NMR Spectra provided by vendor of 1-{[4-(3-chlorobenzyl)-1-piperazinyl]methyl}-1H-indole-2,3-dione (**18**).

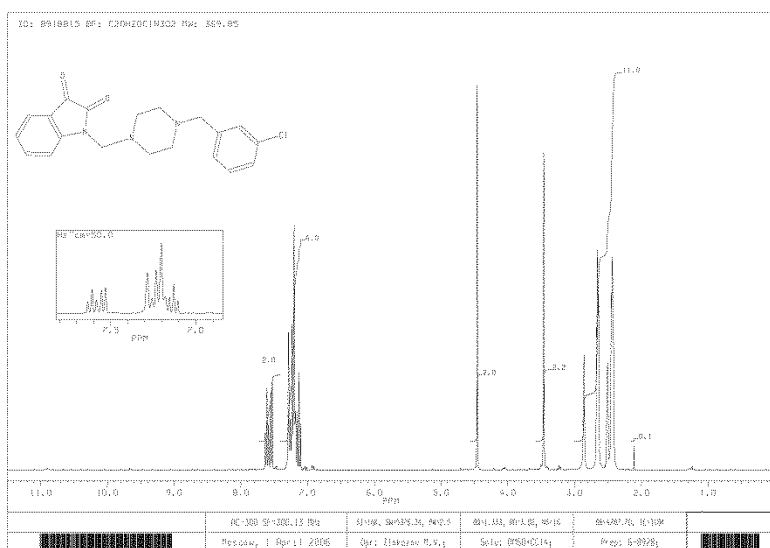

**Figure S21.** NMR Spectra provided by vendor of 1-{[4-(2-fluorobenzyl)-1-piperazinyl]methyl}-1H-indole-2,3-dione (**15**).

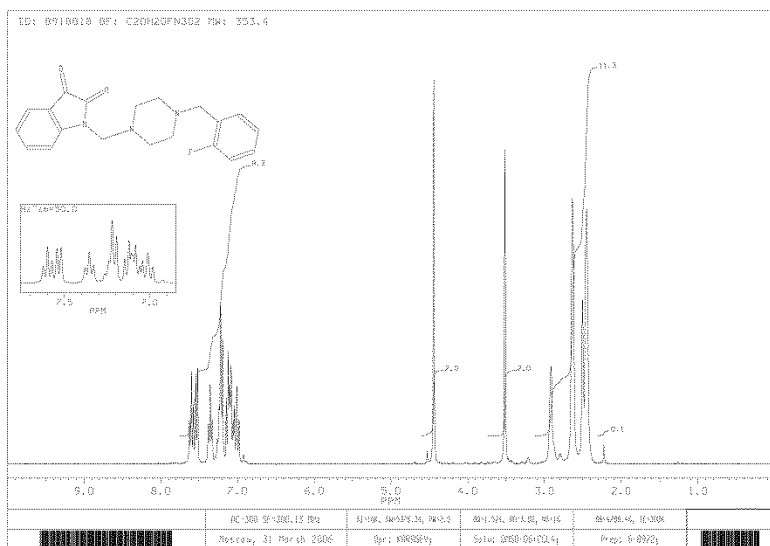

**Figure S22.** NMR Spectra provided by vendor of 1-{[4-(3-fluorobenzyl)-1-piperazinyl]methyl}-1H-indole-2,3-dione (**17**).

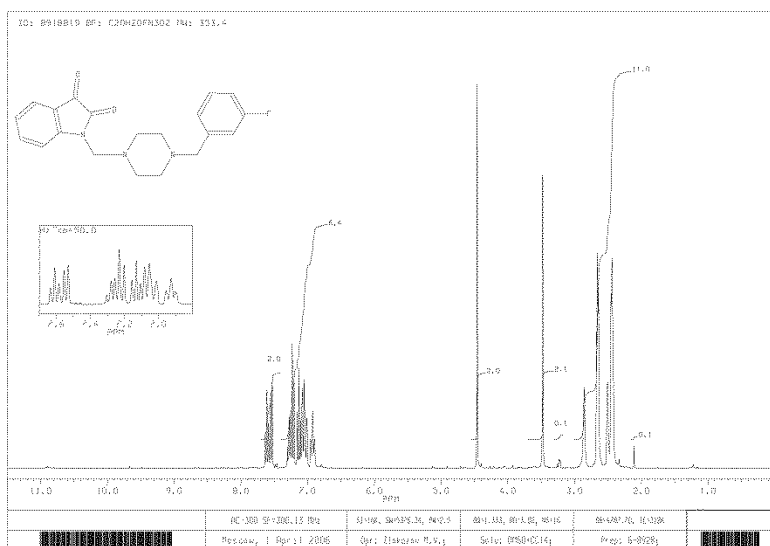

**Figure S23.** NMR Spectra provided by vendor of 1-[4-(3-methoxybenzyl)-1-piperazinyl]methyl]-1H-indole-2,3-dione (**19**).

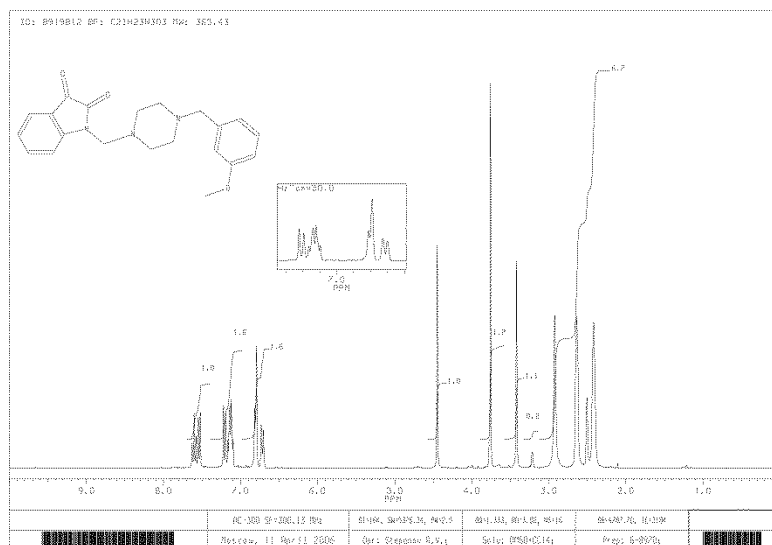

**Figure S24.** NMR Spectra provided by vendor of 1-[4-(1,3-benzodioxol-5-ylmethyl)-1-piperazinyl]methyl]-5-bromo-1H-indole-2,3-dione (**21**).

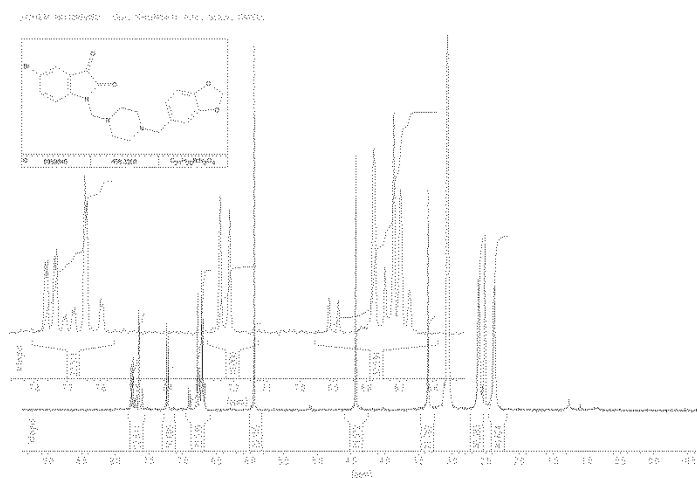

**Figure S25.** NMR Spectra provided by vendor of 1,1'-[1,3-imidazolidinediylbis(methylene)]bis(1H-indole-2,3-dione) (**22**).

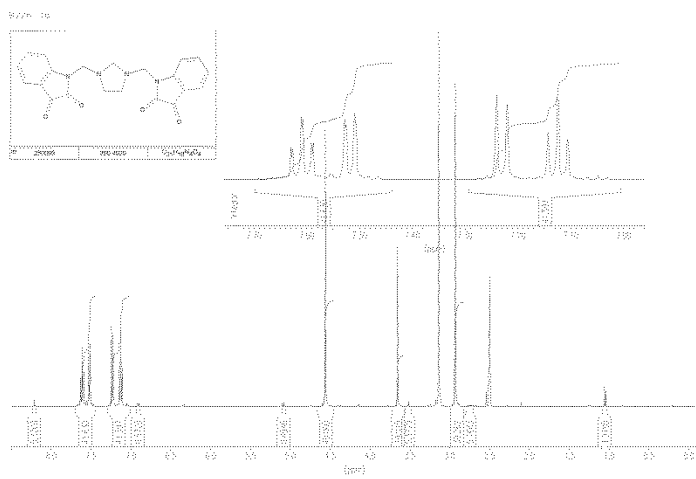

**Figure S26.** NMR Spectra provided by vendor of 1-(4-morpholinylmethyl)-1H-indole-2,3-dione (**12**).

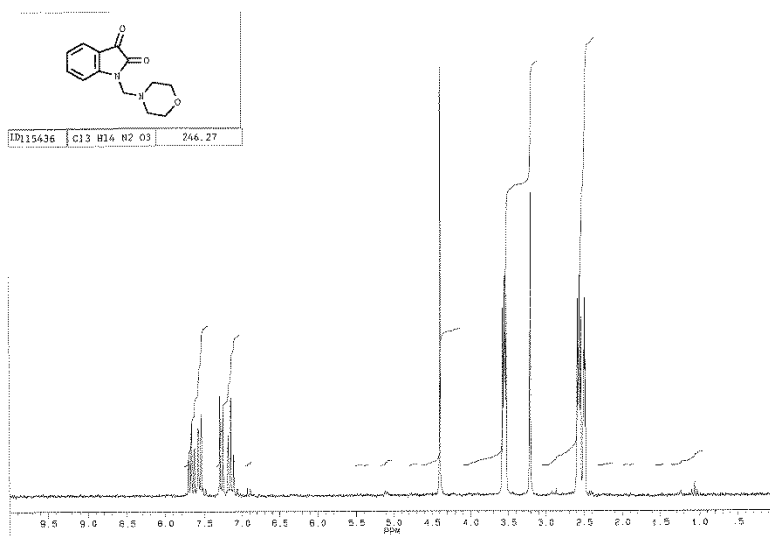

**Figure S27.** NMR Spectra provided by vendor of 1-[(4-methyl-1-piperazinyl)methyl]-1H-indole-2,3-dione (**13**).

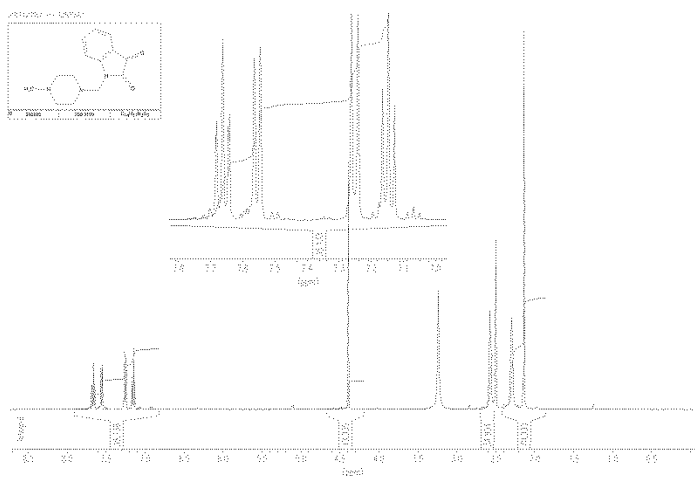

**Figure S28.** NMR Spectra provided by vendor of 1-[(4-benzyl-1-piperazinyl)methyl]-1H-indole-2,3-dione (**14**).

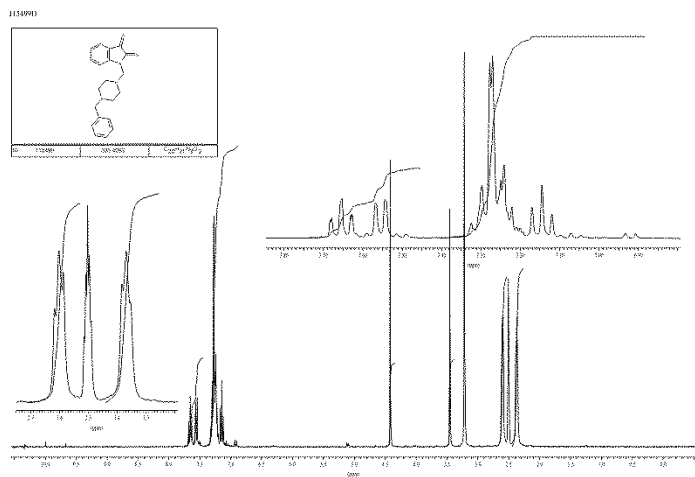

**Figure S29.** NMR Spectra provided by vendor of 1-pentyl-2,3-dihydro-1H-indole-2,3-dione (2).

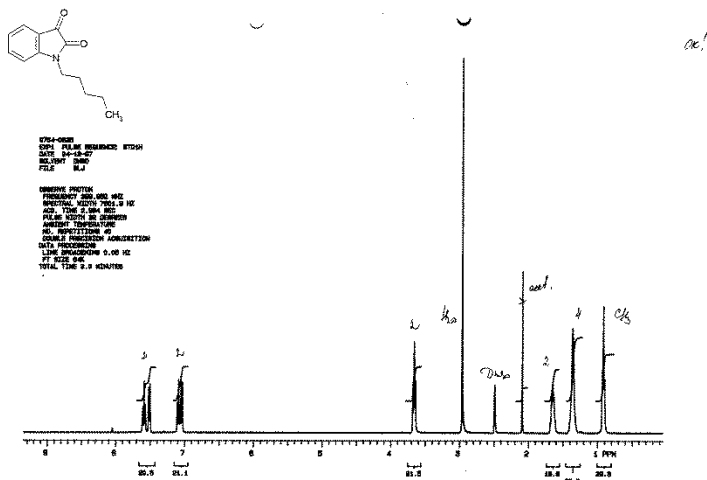

**Figure S30.** NMR Spectra provided by vendor of 1-benzyl-2,3-dihydro-1H-indole-2,3-dione (3).

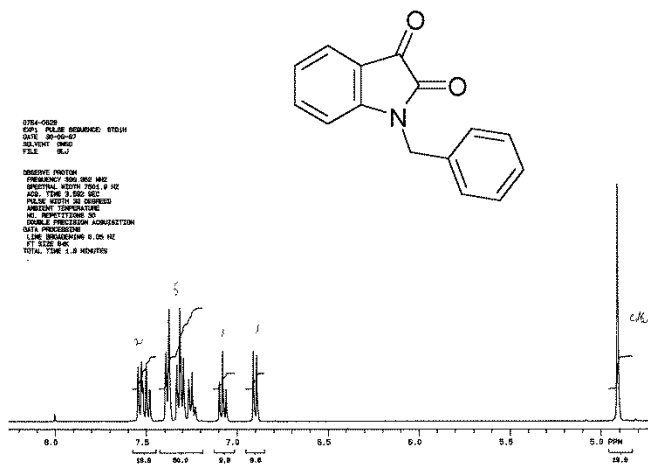



**Figure S31.** NMR Spectra provided by vendor of 1-benzyl-5-chloro-2,3-dihydro-1H-indole-2,3-dione (**4**) (PO # 950549)

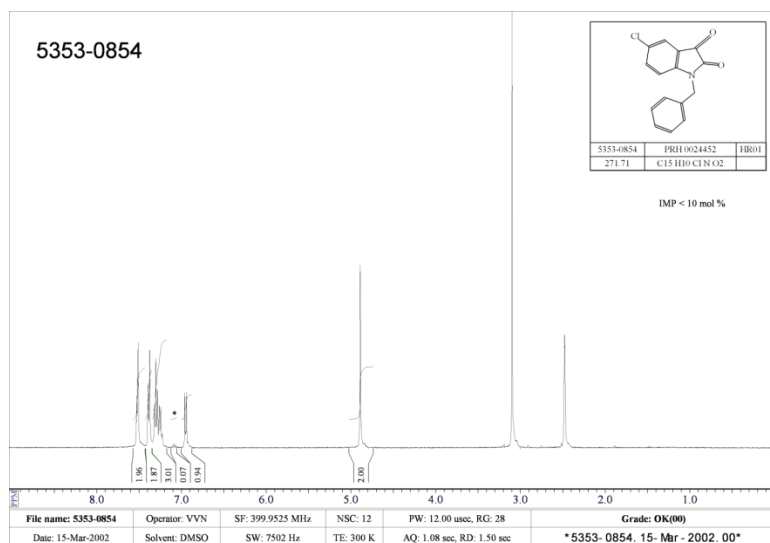

**Figure S32.** NMR Spectra provided by vendor of 5-chloro-1-[(2E)-3-phenylprop-2-en-1-yl]-2,3-dihydro-1H-indole-2,3-dione (**11**)

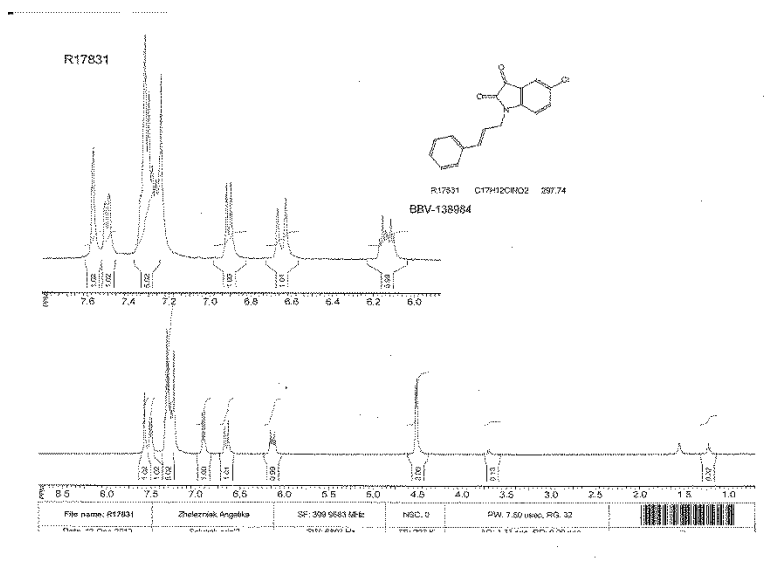

Supplement: jm401377v_si_001.pdf [file jm401377v_si_001.pdf]
